# Supplementary material for: Combined assessment of the TNM stage and BRAF mutational status at diagnosis in sporadic colorectal cancer patients
Source: PubMed Central journal article supplement (PMC5963609; doi:10.18632/oncotarget.25300), 2018-05-08
Supplement: oncotarget-09-24081-s001.pdf [file oncotarget-09-24081-s001.pdf]

# Combined assessment of the TNM stage and *BRAF* mutational status at diagnosis in sporadic colorectal cancer patients

## SUPPLEMENTARY MATERIALS

Progression free survival of gse39582 dataset patients according to proposed score

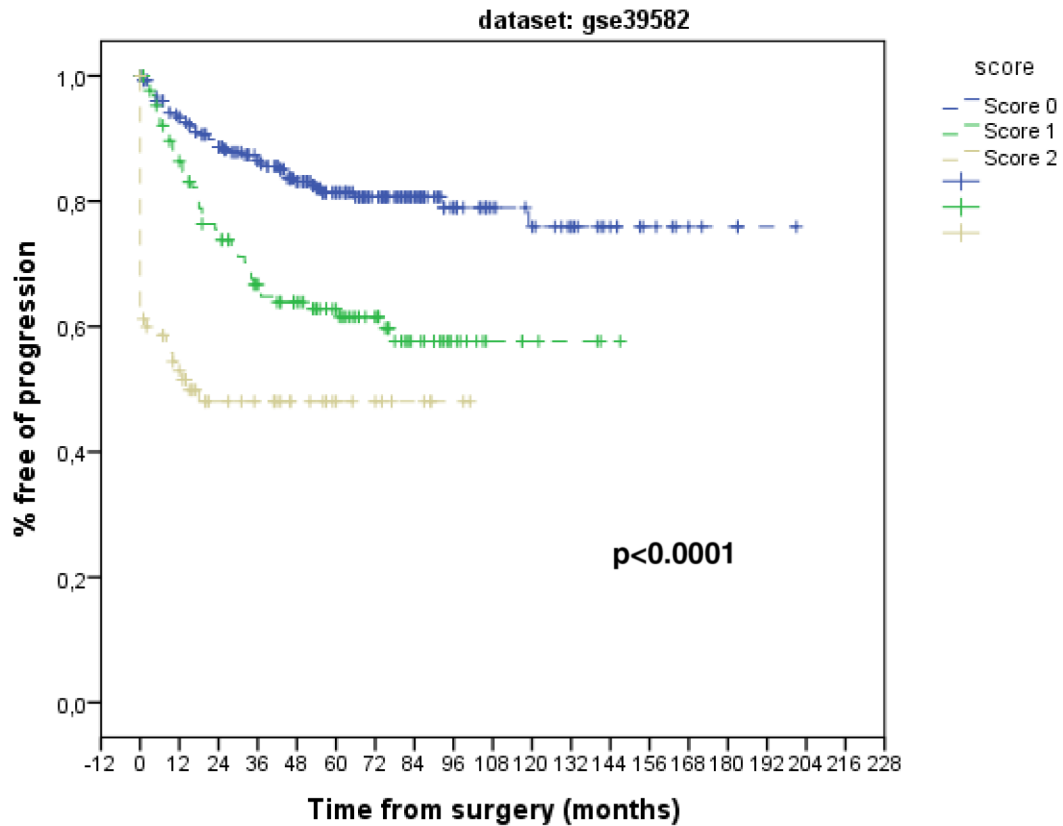

Supplementary Figure 1: Progression free survival plot of external dataset (GSE39582) of patients according to our proposed score.

**Supplementary Table 1: Number of reads of each amplicon per patient**

See Supplementary File 1

**Supplementary Table 2: KRAS, BRAF, NRAS and TP53 variants detected and their variant allele frequency (VAF) per tumor/case analyzed, the administered treatment and microsatellite status**

See Supplementary File 2

**Supplementary Table 3: Ad-hoc statistical power estimation for the Chi-Square and Fisher exact tests used to estimate the significance of potential association between the distinct gene mutations identified in our patient cohort and the clinical and biological characteristics of the disease**

| <b><i>KRAS</i> mutational status</b> |                   |                        |                      |                |                                     |
|--------------------------------------|-------------------|------------------------|----------------------|----------------|-------------------------------------|
| <b>Variable</b>                      | <b>Categories</b> | <b>N. of Cases (%)</b> | <b>KRAS mutation</b> | <b>P-value</b> | <b>Power (1-<math>\beta</math>)</b> |
| Site of primary tumor                | Right Colon       | 44 (51)                | 17 (39)              | 0.05           | <b>1.00</b>                         |
|                                      | Left Colon        | 39 (45)                | 7 (18)               |                |                                     |
|                                      | Rectum            | 4 (4)                  | 0 (0)                |                |                                     |
| Grade of differentiation             | Well              | 24 (30)                | 12 (50)              | 0.04           | <b>1.00</b>                         |
|                                      | Moderadate        | 49 (61)                | 10 (20)              |                |                                     |
| Lymphovascular Invasion              | Poor              | 7 (9)                  | 2 (29)               | 0.05           | 0.43                                |
|                                      | No                | 68 (78)                | 22 (32)              |                |                                     |
| Yes                                  | 19 (22)           | 2 (11)                 |                      |                |                                     |
| <b><i>BRAF</i> mutational status</b> |                   |                        |                      |                |                                     |
| <b>Variable</b>                      | <b>Categories</b> | <b>N. of Cases (%)</b> | <b>BRAF mutation</b> | <b>P-value</b> | <b>Power (1-<math>\beta</math>)</b> |
| Grade of differentiation             | Well              | 24 (30)                | 0 (0)                | 0.02           | <b>1.00</b>                         |
|                                      | Moderadate        | 49 (61)                | 3 (6)                |                |                                     |
|                                      | Poor              | 7 (9)                  | 2 (29)               |                |                                     |
| Peritoneal carcinomatosis            | No                | 80 (91)                | 3 (4)                | 0.006          | <b>0.79</b>                         |
|                                      | Yes               | 7 (9)                  | 3 (43)               |                |                                     |
| Microsatellite instability           | No                | 48 (89)                | 2 (4)                | 0.007          | 0.75                                |
|                                      | Yes               | 6 (11)                 | 3 (50)               |                |                                     |
| <b><i>TP53</i> mutational status</b> |                   |                        |                      |                |                                     |
| <b>Variable</b>                      | <b>Categories</b> | <b>N. of Cases (%)</b> | <b>TP53 mutation</b> | <b>P-value</b> | <b>Power (1-<math>\beta</math>)</b> |
| Gender                               | Male              | 51 (59)                | 21 (41)              | 0.05           | 0.54                                |
|                                      | Female            | 36 (41)                | 8 (22)               |                |                                     |

Bold letters indicate adequate statistical power (Power (1- $\beta$ )> 0.8).

Only variables that displayed a statistical significant association with the mutational status of the different genes investigated are included in this table. Other clinical and biological disease features statistically not significantly associated with the mutational status for the investigated genes showed a statistical power below the established threshold of >0.80, due to small sample size.

**Supplementary Table 4: Statistical power calculation for progression free survival (PFS) and overall survival (OS) based on the log-rank test**

| <b>Progression free survival</b> |                    |                     |                |                             |
|----------------------------------|--------------------|---------------------|----------------|-----------------------------|
| <b>Variable</b>                  | <b>N. of cases</b> | <b>% 2-year PFS</b> | <b>P-value</b> | <b>Power (1-β) (2-tail)</b> |
| Gender                           |                    |                     |                |                             |
| Male                             | 41                 | 90%                 | 0.03           | <b>0.77</b>                 |
| Female                           | 33                 | 63%                 |                |                             |
| TNM stage at diagnosis           |                    |                     |                |                             |
| Stage 0/I/II                     | 42                 | 91%                 | <0.001         | 0.43                        |
| Stage III                        | 26                 | 75%                 |                | NAN                         |
| Stage IV                         | 6                  | 0%                  |                | NAN                         |
| Grade of differentiation         |                    |                     |                |                             |
| Well                             | 22                 | 95%                 | 0.03           | 0.41                        |
| Moderate                         | 46                 | 77%                 |                | <b>0.94</b>                 |
| Poor                             | 6                  | 33%                 |                | <b>0.82</b>                 |
| Lymphovascular invasion          |                    |                     |                |                             |
| No                               | 60                 | 83%                 | 0.004          | 0.73                        |
| Yes                              | 14                 | 54%                 |                |                             |
| Perineural invasion              |                    |                     |                |                             |
| No                               | 57                 | 83%                 | 0.03           | 0.49                        |
| Yes                              | 17                 | 62%                 |                |                             |
| <i>BRAF</i>                      |                    |                     |                |                             |
| Wild type                        | 69                 | 79%                 | 0.05           | 0.20                        |
| Mutated                          | 5                  | 60%                 |                |                             |
| <b>Overall survival</b>          |                    |                     |                |                             |
| <b>Variable</b>                  | <b>N. of cases</b> | <b>% 2-year OS</b>  | <b>P-value</b> | <b>Power (1-β) (2-tail)</b> |
| TNM stage at diagnosis           |                    |                     |                |                             |
| Stage 0/I/II                     | 42                 | 97%                 | 0.02           | 0.31                        |
| Stage III                        | 26                 | 88%                 |                | 0.45                        |
| Stage IV                         | 6                  | 80%                 |                | 0.08                        |
| Tumor size                       |                    |                     |                |                             |
| <4 cm                            | 44                 | 100%                | 0.005          | 0.00                        |
| ≥4 cm                            | 30                 | 81%                 |                |                             |
| Microsatellite instability       |                    |                     |                |                             |
| No                               | 43                 | 92%                 | 0.01           | <b>0.97</b>                 |
| Yes                              | 5                  | 40%                 |                |                             |
| <i>BRAF</i>                      |                    |                     |                |                             |
| Wild type                        | 69                 | 94%                 | 0.001          | 0.24                        |
| Mutated                          | 5                  | 80%                 |                |                             |

NAN: it is not possible to calculate this value.

Bold letter indicate adequate statistical power (Power (1-β)> 0.8).
